# Supplementary material for: Ideas and perspectives: Holocene thermokarst sediments of the Yedoma permafrost region do not increase the northern peatland carbon pool
Source: Copernicus journal article supplement (doi:10.5194/bg-13-2003-2016), 2016-04-06
Supplement: Supplementary file [file bg-13-2003-2016-supplement-title-page.pdf › bg-13-2003-2016-supplement-title-page.pdf]

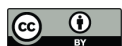

## *Supplement of*

# **Ideas and perspectives: Holocene thermokarst sediments of the Yedoma permafrost region do not increase the northern peatland carbon pool**

**Gustaf Hugelius et al.**

*Correspondence to:* Gustaf Hugelius ([gustaf.hugelius@natgeo.su.se](mailto:gustaf.hugelius@natgeo.su.se))

- [bg-13-2003-2016-supplement-title-page.pdf](#)
- [supplement\\_hugelius\\_bg\\_submission](#)
  - [Hugeliusetal\\_2016\\_submission\\_2060329\\_supplement.docx](#)

The copyright of individual parts of the supplement might differ from the CC-BY 3.0 licence.
